# Supplementary material
Source: PubMed Central journal article supplement (PMC4959211)
Supplement: AEM.00933-16_zam999117287so1.pdf [file AEM.00933-16_zam999117287so1.pdf]

Exogenous fatty acids protect *Enterococcus faecalis* from daptomycin induced membrane stress independent of the response regulator LiaR

John R. Harp<sup>1</sup>, Holly E. Saito<sup>1</sup>, Allen K. Bourdon<sup>2</sup>, Jinnethe Reyes<sup>3</sup>, Cesar A. Arias<sup>3,4</sup>, Shawn R. Campagna<sup>2</sup>, and Elizabeth M. Fozo<sup>1\*</sup>

#### Author Affiliations

<sup>1</sup>Department of Microbiology, University of Tennessee, Knoxville, TN, USA

<sup>2</sup>Department of Chemistry, University of Tennessee, Knoxville, TN, USA

<sup>3</sup>Department of Internal Medicine, Division of Infectious Diseases and Department of Microbiology and Molecular Genetics, University of Texas Medical School at Houston, TX, USA

<sup>4</sup>Molecular Genetics and Antimicrobial Resistance Unit, International Center for Microbial Genomics Universidad El Bosque, Bogotá, Colombia

\*To whom correspondence should be addressed: Tel.: +1 865 974 4028; Fax: +1 865 974 4007;

Email: efozo@utk.edu

Running title: Fatty acids protect LiaR-deficient *E. faecalis* from damage

## SUPPLEMENTAL MATERIALS AND METHODS

For supplemental materials and methods, refer to materials and methods in the main text.

### Proton Nuclear Magnetic Resonance ( $^1\text{H}$ NMR) Profile

*1.23 mM Daptomycin*:  $^1\text{H}$  NMR (500 MHz, Methanol- $d_4$ )  $\delta$  7.65 (dd,  $J = 8.3, 1.5$  Hz, 1H), 7.54 (dt,  $J = 7.9, 1.0$  Hz, 1H), 7.32 (dd,  $J = 8.2, 0.9$  Hz, 1H), 7.21 (ddd,  $J = 8.4, 6.9, 1.4$  Hz, 1H), 7.15 (s, 1H), 7.07 (ddd,  $J = 8.1, 7.0, 1.1$  Hz, 1H), 6.98 (ddd,  $J = 8.0, 7.0, 1.0$  Hz, 1H), 6.70 (dd,  $J = 8.5, 1.1$  Hz, 1H), 6.54 (ddd,  $J = 8.1, 6.9, 1.2$  Hz, 1H), 5.45 – 5.39 (m, 1H), 4.72 (t,  $J = 6.7$  Hz, 1H), 4.64 (t,  $J = 6.7$  Hz, 1H), 4.63 – 4.58 (m, 2H), 4.54 (d,  $J = 3.4$  Hz, 1H), 4.52 (d,  $J = 7.6$  Hz, 1H), 4.48 (t,  $J = 5.4$  Hz, 1H), 4.36 – 4.30 (m, 1H), 4.28 (t,  $J = 7.1$  Hz, 1H), 3.99 (d,  $J = 4.3$  Hz, 1H), 3.94 (d,  $J = 11.7$  Hz, 2H), 3.86 (qd,  $J = 11.0, 9.9, 4.2$  Hz, 3H), 3.51 (q,  $J = 7.0, 4.6$  Hz, 1H), 3.24 (dd,  $J = 14.3, 7.8$  Hz, 1H), 3.12 (dd,  $J = 14.3, 7.3$  Hz, 1H), 2.98 – 2.79 (m, 5H), 2.74 (dt,  $J = 15.9, 7.5$  Hz, 3H), 2.69 – 2.58 (m, 3H), 2.40 (dd,  $J = 15.6, 6.5$  Hz, 1H), 2.30 – 2.12 (m, 5H), 1.97 (d,  $J = 0.7$  Hz, 1H), 1.91 – 1.76 (m, 2H), 1.72 (q,  $J = 7.6$  Hz, 2H), 1.50 (q,  $J = 7.6$  Hz, 2H), 1.38 – 1.27 (m, 9H), 1.27 – 1.14 (m, 16H), 0.97 (d,  $J = 6.9$  Hz, 3H), 0.89 (t,  $J = 7.0$  Hz, 4H).

*50 mM Oleic Acid*:  $^1\text{H}$  NMR (500 MHz, Methanol- $d_4$ )  $\delta$  5.34 (ddd,  $J = 5.7, 4.4, 1.1$  Hz, 2H), 2.27 (t,  $J = 7.4$  Hz, 2H), 2.03 (q,  $J = 5.8$  Hz, 4H), 1.59 (p,  $J = 7.3, 7.3$  Hz, 2H), 1.39 – 1.24 (m, 20H), 0.89 (t,  $J = 6.9$  Hz, 3H).

*1.20 mM Daptomycin and 1.20 mM Oleic Acid*:  $^1\text{H}$  NMR (500 MHz, Methanol- $d_4$ )  $\delta$  7.66 (d,  $J = 8.1$  Hz, 1H), 7.55 (d,  $J = 7.9$  Hz, 1H), 7.32 (d,  $J = 8.1$  Hz, 1H), 7.21 (t,  $J = 8.0$  Hz, 1H), 7.14 (s, 1H), 7.07 (t,  $J = 7.5$  Hz, 1H), 6.98 (t,  $J = 7.5$  Hz, 1H), 6.70 (d,  $J = 8.4$  Hz, 1H), 6.54 (t,  $J = 7.6$  Hz, 1H), 5.46 – 5.39 (m, 1H), 5.34 (t,  $J = 4.9$  Hz, 1H), 4.70 (t,  $J = 6.7$  Hz, 1H), 4.67 – 4.52 (m,

4H), 4.47 (s, 1H), 4.37 – 4.26 (m, 2H), 4.06 – 3.97 (m, 1H), 3.94 (d,  $J = 15.3$  Hz, 2H), 3.88 (d,  $J = 16.6$  Hz, 3H), 3.52 (s, 2H), 3.44 (p,  $J = 1.6$  Hz, 2H), 3.16 (p,  $J = 1.7$  Hz, 2H), 3.12 (dd,  $J = 14.4$ , 7.3 Hz, 1H), 2.97 – 2.91 (m, 2H), 2.89 – 2.66 (m, 4H), 2.66 – 2.58 (m, 2H), 2.39 (dd,  $J = 15.5$ , 6.6 Hz, 1H), 2.33 – 2.13 (m, 6H), 2.06 – 1.99 (m, 2H), 1.92 – 1.78 (m, 1H), 1.72 (q,  $J = 7.5$  Hz, 2H), 1.65 – 1.56 (m, 1H), 1.52 – 1.45 (m, 2H), 1.38 – 1.27 (m, 20H), 1.23 (dd,  $J = 16.8$ , 5.5 Hz, 15H), 0.98 (d,  $J = 6.9$  Hz, 4H), 0.89 (td,  $J = 6.9$ , 5.0 Hz, 5H).

*1.10 mM Daptomycin and 5.50 mM Oleic Acid:*  $^1\text{H}$  NMR (500 MHz, Methanol- $d_4$ )  $\delta$  7.66 (d,  $J = 8.1$  Hz, 1H), 7.55 (d,  $J = 7.9$  Hz, 1H), 7.32 (d,  $J = 8.1$  Hz, 1H), 7.24 – 7.18 (t,  $J = 8.0$  Hz, 1H), 7.14 (s, 1H), 7.07 (t,  $J = 7.5$  Hz, 1H), 6.98 (t,  $J = 7.5$  Hz, 1H), 6.70 (d,  $J = 8.1$  Hz, 1H), 6.54 (t,  $J = 7.6$  Hz, 1H), 5.46 – 5.39 (m, 1H), 5.34 (ddd,  $J = 5.6$ , 4.4, 1.1 Hz, 10H), 4.71 (m, 1H), 4.62 (t,  $J = 6.4$  Hz, 1H), 4.54 (s, 2H), 4.47 (s, 1H), 4.37 – 4.26 (m, 1H), 4.02 (d,  $J = 16.2$  Hz, 1H), 3.94 (d,  $J = 15.0$  Hz, 2H), 3.85 (d,  $J = 15.8$  Hz, 3H), 3.52 (s, 2H), 3.44 (p,  $J = 1.7$  Hz, 2H), 3.16 (p,  $J = 1.6$  Hz, 2H), 2.94 (s, 3H), 2.89 – 2.67 (m, 9H), 2.63 (d,  $J = 15.3$  Hz, 2H), 2.40 (dd,  $J = 15.5$ , 6.4 Hz, 1H), 2.25 (t,  $J = 7.5$  Hz, 10H), 2.18 (t,  $J = 7.6$  Hz, 3H), 2.07 – 1.99 (m, 20H), 1.76 – 1.69 (m, 2H), 1.64 – 1.55 (m, 10H), 1.49 (s, 3H), 1.38 – 1.27 (m, 100H), 1.27 – 1.19 (m, 12H), 0.98 (d,  $J = 6.9$  Hz, 4H), 0.89 (td,  $J = 6.9$ , 5.3 Hz, 18H).

*1.21 mM Daptomycin and 1.64 mM Calcium Chloride:*  $^1\text{H}$  NMR (500 MHz, Methanol- $d_4$ )  $\delta$  7.65 (dd,  $J = 8.3$ , 1.5 Hz, 1H), 7.53 (s, 1H), 7.30 (s, 1H), 7.24 (s, 1H), 7.15 (s, 1H), 7.07 (t,  $J = 7.6$  Hz, 1H), 6.98 (t,  $J = 7.5$  Hz, 1H), 6.75 (d,  $J = 10.6$  Hz, 1H), 6.58 (s, 1H), 5.45 – 5.39 (m, 1H), 4.72 (t,  $J = 6.7$  Hz, 1H), 4.64 (t,  $J = 6.7$  Hz, 1H), 4.63 – 4.58 (m, 2H), 4.54 (d,  $J = 3.4$  Hz, 1H), 4.52 (d,  $J = 7.6$  Hz, 1H), 4.49 (s, 1H), 4.36 – 4.30 (m, 1H), 4.29 (s, 1H), 4.02 (s, 1H), 3.94 (m, 2H), 3.86

(m, 3H), 3.53 (m, 1H), 3.31 (dd,  $J = 7.3, 2.2$  Hz, 1H), 3.12 (m, 1H), 2.96-2.84 (s, 5H), 2.77 (s, 3H), 2.69 – 2.58 (m, 3H), 2.38 (d,  $J = 18.0$  Hz, 1H), 2.30 – 2.12 (m, 5H), 1.95 (s, 1H), 1.77 (s, 2H), 1.72 (m, 2H), 1.45 (s, 2H), 1.33 (m, 9H), 1.29 – 1.13 (m, 16H), 0.95 (s, 3H), 0.89 (t,  $J = 7.1$  Hz, 4H).

*1.20 mM Daptomycin, 1.60 mM Calcium Chloride, and 1.20 mM Oleic Acid:*  $^1\text{H}$  NMR (500 MHz, Methanol- $d_4$ )  $\delta$  7.71 (s, 1H), 7.53 (s, 1H), 7.30 (s, 1H), 7.24 (s, 1H), 7.07 (t,  $J = 7.6$  Hz, 1H), 6.98 (t,  $J = 7.5$  Hz, 1H), 6.74 (s, 1H), 6.58 (s, 1H), 5.46 – 5.39 (m, 1H), 5.34 (m, 1H), 4.70 (t,  $J = 6.7$  Hz, 1H), 4.67 – 4.52 (m, 4H), 4.49 (s, 1H), 4.29 (s, 2H), 4.01 – 3.92 (m, 3H), 3.79 (s, 3H), 3.54 – 3.12 (m, 7H), 2.96 (s, 2H), 2.87 – 2.80 (m, 4H), 2.66 – 2.58 (m, 2H), 2.38 (d,  $J = 18.2$  Hz, 1H), 2.34 – 2.13 (m, 6H), 2.06 – 1.97 (m, 2H), 1.94 – 1.78 (m, 1H), 1.77 (s, 2H), 1.60 – 1.45 (m, 3H), 1.35 – 1.25 (m, 20H), 1.24 (s, 15H), 1.19 (s, 2H), 1.13 (s, 2H), 0.89 (t,  $J = 7.1$  Hz, 4H).

*1.05 mM Daptomycin, 1.45 mM Calcium Chloride, and 5.8 mM Oleic Acid:*  $^1\text{H}$  NMR (500 MHz, Methanol- $d_4$ )  $\delta$  7.70 (s, 1H), 7.53 (s, 1H), 7.30 (s, 1H), 7.24 (s, 1H), 7.14 (s, 1H), 7.07 (t,  $J = 7.6$  Hz, 1H), 6.98 (t,  $J = 7.5$  Hz, 1H), 6.74 (s, 1H), 6.58 (s, 1H), 5.34 (ddd,  $J = 5.7, 4.5, 1.1$  Hz, 10H), 4.71 (m, 1H), 4.63 (t,  $J = 6.4$  Hz, 1H), 4.54 (m, 2H), 4.48 (s, 1H), 4.29 (s, 1H), 4.02 (d,  $J = 16.5$  Hz, 1H), 3.79 – 3.40 (m, 7H), 3.21 (td,  $J = 5.0, 2.4$  Hz, 2H), 2.96 (s, 3H), 2.87 – 2.62 (m, 11H), 2.40 (s, 1H), 2.27 – 2.11 (m, 10H), 2.03 – 1.95 (m, 20H), 1.77 (s, 2H), 1.63 – 1.56 (m, 10H), 1.45 (s, 2H), 1.36 – 1.26 (m, 100H), 1.24 (s, 15H), 1.19 (s, 3H), 1.13 (s, 2H), 0.95 (s, 4H), 0.89 (td,  $J = 7.0, 4.8$  Hz, 15H).

SUPPLEMENTARY TABLE S1. Membrane analysis of wild type and mutant strains during log phase growth.

| Strain                                                                          | Percent of total membrane content for indicated strain and supplement (avg $\pm$ SD) <sup>a</sup> |                      |                      |
|---------------------------------------------------------------------------------|---------------------------------------------------------------------------------------------------|----------------------|----------------------|
|                                                                                 | WT                                                                                                | $\Delta liaR$        | $\Delta liaR::liaR$  |
| Fatty Acid                                                                      | Ethanol <sup>b</sup>                                                                              | Ethanol <sup>b</sup> | Ethanol <sup>b</sup> |
| C <sub>12:0</sub>                                                               | 1.4 $\pm$ 1.1                                                                                     | 1.3 $\pm$ 0.9        | 0.9 $\pm$ 0.1        |
| C <sub>14:0</sub>                                                               | 4.6 $\pm$ 0.4                                                                                     | 4.2 $\pm$ 0.2        | 6.4 $\pm$ 0.1        |
| C <sub>16:1</sub>                                                               | 5.7 $\pm$ 0.3                                                                                     | 5.5 $\pm$ 0.8        | 8.7 $\pm$ 0.1        |
| C <sub>16:0</sub>                                                               | 39.8 $\pm$ 0.5                                                                                    | 42.7 $\pm$ 1.8       | 37.5 $\pm$ 0.1       |
| C <sub>17:1</sub>                                                               | ND                                                                                                | ND                   | ND                   |
| C <sub>17:0 2OH</sub>                                                           | 7.5 $\pm$ 1.0                                                                                     | 5.3 $\pm$ 3.1        | 5.9 $\pm$ 0.3        |
| C <sub>18:1 cis 9</sub>                                                         | 0.3 $\pm$ 0.6                                                                                     | 0.7 $\pm$ 1.3        | 0.6 $\pm$ 0.5        |
| C <sub>18:1 cis 11</sub>                                                        | 34.0 $\pm$ 1.0                                                                                    | 32.6 $\pm$ 1.1       | 35.7 $\pm$ 0.1       |
| C <sub>18:0</sub>                                                               | 5.6 $\pm$ 0.1                                                                                     | 6.9 $\pm$ 0.8        | 3.2 $\pm$ 0.1        |
| C <sub>20:0</sub>                                                               | ND                                                                                                | ND                   | ND                   |
| C <sub>18:2</sub>                                                               | ND                                                                                                | ND                   | ND                   |
| Others <sup>c</sup>                                                             | 0.7 $\pm$ 0.3                                                                                     | 0.4 $\pm$ 0.4        | 0.7 $\pm$ 0.2        |
| Sat:Unsat                                                                       | 1.3 $\pm$ 1.0                                                                                     | 1.4 $\pm$ 1.1        | 1.1 $\pm$ 0.6        |
| C <sub>10</sub> -C <sub>17</sub> :C <sub>18</sub> -C <sub>20</sub> <sup>d</sup> | 1.5 $\pm$ 0.3                                                                                     | 1.5 $\pm$ 0.03       | 1.5 $\pm$ 0.1        |

<sup>a</sup> Membrane content determined by GC-FAME analysis by Microbial ID, Inc. Values represent average and standard deviations of three independent cultures. ND indicates fatty acid was not detected.

<sup>b</sup> Ethanol solvent control was added to a final concentration of 0.2%.

<sup>c</sup> Others indicates fatty acids comprised <1% of the total membrane content.

<sup>d</sup> Total fatty acid length ratios including both saturated and unsaturated fatty acids.

SUPPLEMENTARY TABLE S2. Membrane fatty acid analysis of clinical isolates during log phase growth.

| Strain                                                                          | Percent of total membrane content for indicated strain and supplement (avg $\pm$ SD) <sup>a</sup> |                      |
|---------------------------------------------------------------------------------|---------------------------------------------------------------------------------------------------|----------------------|
|                                                                                 | S613                                                                                              | R712                 |
| Fatty Acid                                                                      | Ethanol <sup>b</sup>                                                                              | Ethanol <sup>b</sup> |
| C <sub>12:0</sub>                                                               | 1.0 $\pm$ 0.0                                                                                     | 0.7 $\pm$ 0.1        |
| C <sub>14:0</sub>                                                               | 5.5 $\pm$ 0.1                                                                                     | 3.8 $\pm$ 0.2        |
| C <sub>16:1</sub>                                                               | 8.0 $\pm$ 0.1                                                                                     | 7.8 $\pm$ 0.4        |
| C <sub>16:0</sub>                                                               | 36.4 $\pm$ 0.2                                                                                    | 29.3 $\pm$ 1.0       |
| C <sub>17:0 2OH</sub>                                                           | 4.4 $\pm$ 0.3                                                                                     | 4.5 $\pm$ 3.9        |
| C <sub>18:1 cis 9</sub>                                                         | 0.9 $\pm$ 0.1                                                                                     | ND                   |
| C <sub>18:1 cis 11</sub>                                                        | 39.1 $\pm$ 0.4                                                                                    | 50.0 $\pm$ 2.1       |
| C <sub>18:0</sub>                                                               | 3.8 $\pm$ 0.1                                                                                     | 3.5 $\pm$ 0.1        |
| C <sub>20:0</sub>                                                               | ND                                                                                                | ND                   |
| C <sub>18:2</sub>                                                               | ND                                                                                                | ND                   |
| C <sub>20:4</sub>                                                               | ND                                                                                                | ND                   |
| Others <sup>c</sup>                                                             | 0.4 $\pm$ 0.7                                                                                     | ND                   |
| Sat:Unsat                                                                       | 1.0 $\pm$ 0.4                                                                                     | 0.6 $\pm$ 0.6        |
| C <sub>10</sub> -C <sub>17</sub> :C <sub>18</sub> -C <sub>20</sub> <sup>d</sup> | 1.3 $\pm$ 0.02                                                                                    | 0.9 $\pm$ 0.08       |

<sup>a</sup> Membrane content determined by GC-FAME analysis by Microbial ID, Inc. Values represent average and standard deviations of three independent cultures. ND indicates fatty acid was not detected.

<sup>b</sup> Ethanol solvent control was added at a final concentration of 0.2%.

<sup>c</sup> Others indicates fatty acids comprised <1% of the total membrane content.

<sup>d</sup> Total fatty acid length ratios including both saturated and unsaturated fatty acids.

- 1) 1mM Oleic Acid
- 2) 340 $\mu$ M Daptomycin
- 3) 338 $\mu$ M Daptomycin and 338 $\mu$ M Oleic Acid

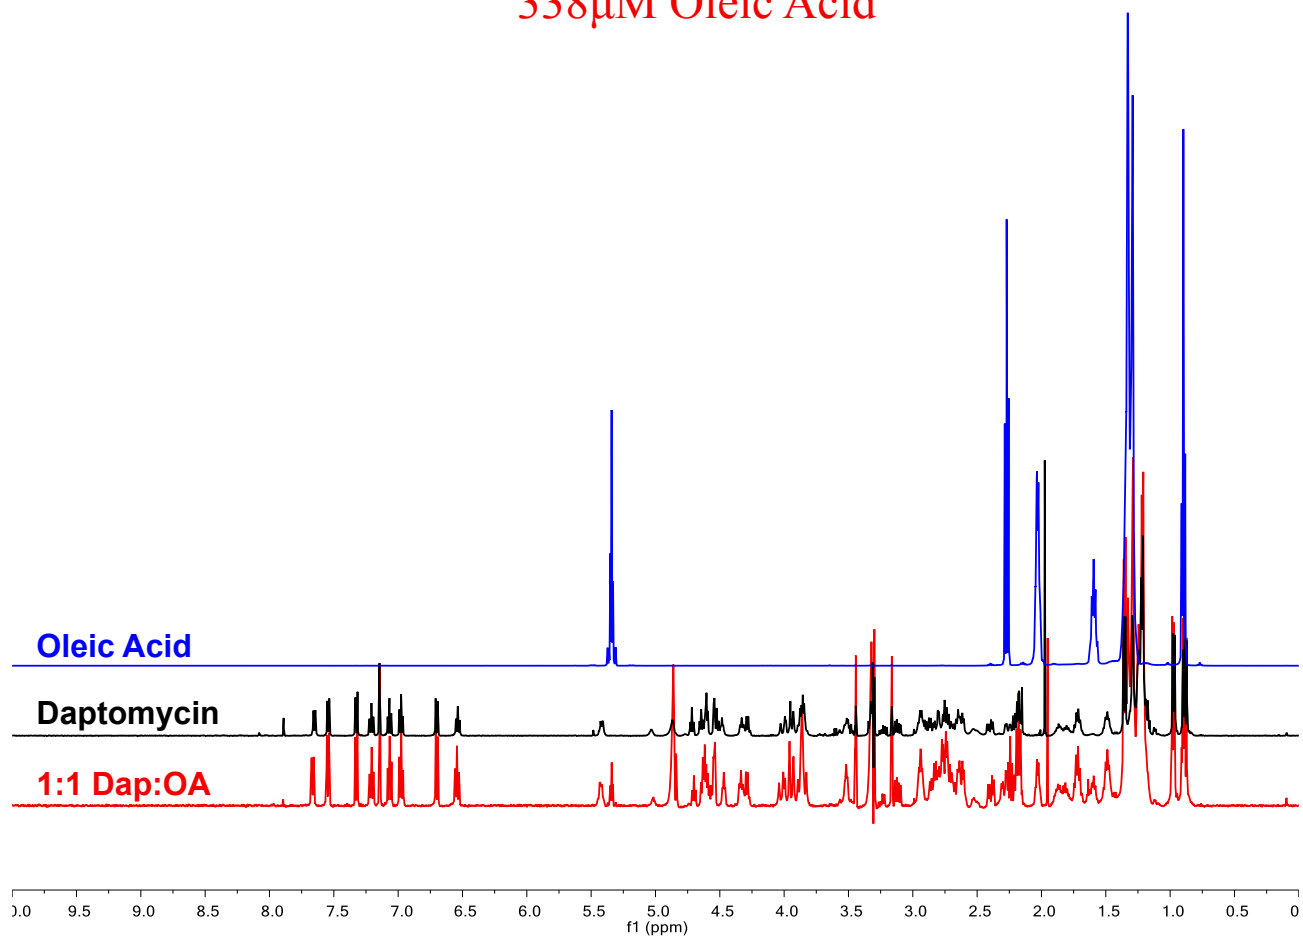

**Supplemental Fig S1.** Mixing 1:1 daptomycin and oleic acid reveals no observable interaction. Visual comparison of three individual <sup>1</sup>H NMR spectra, between 0.0 to 10.0 ppm, shows no interaction between daptomycin and oleic acid. The top spectra (blue) represents a 1mM solution of oleic acid, the middle spectra (black) represents a 340 $\mu$ M solution of daptomycin, and the bottom spectra (red) represents a 1:1 mixture of daptomycin:oleic acid. All solutions were made using methanol-*d*<sub>4</sub>, and spectra were generated using a VNMRS 500 MHz instrument. Spectra were superimposed using MestReNova software.

- 1) 1mM Oleic Acid
- 2) 340 $\mu$ M Daptomycin
- 3) 334 $\mu$ M Daptomycin and 1.67mM Oleic Acid

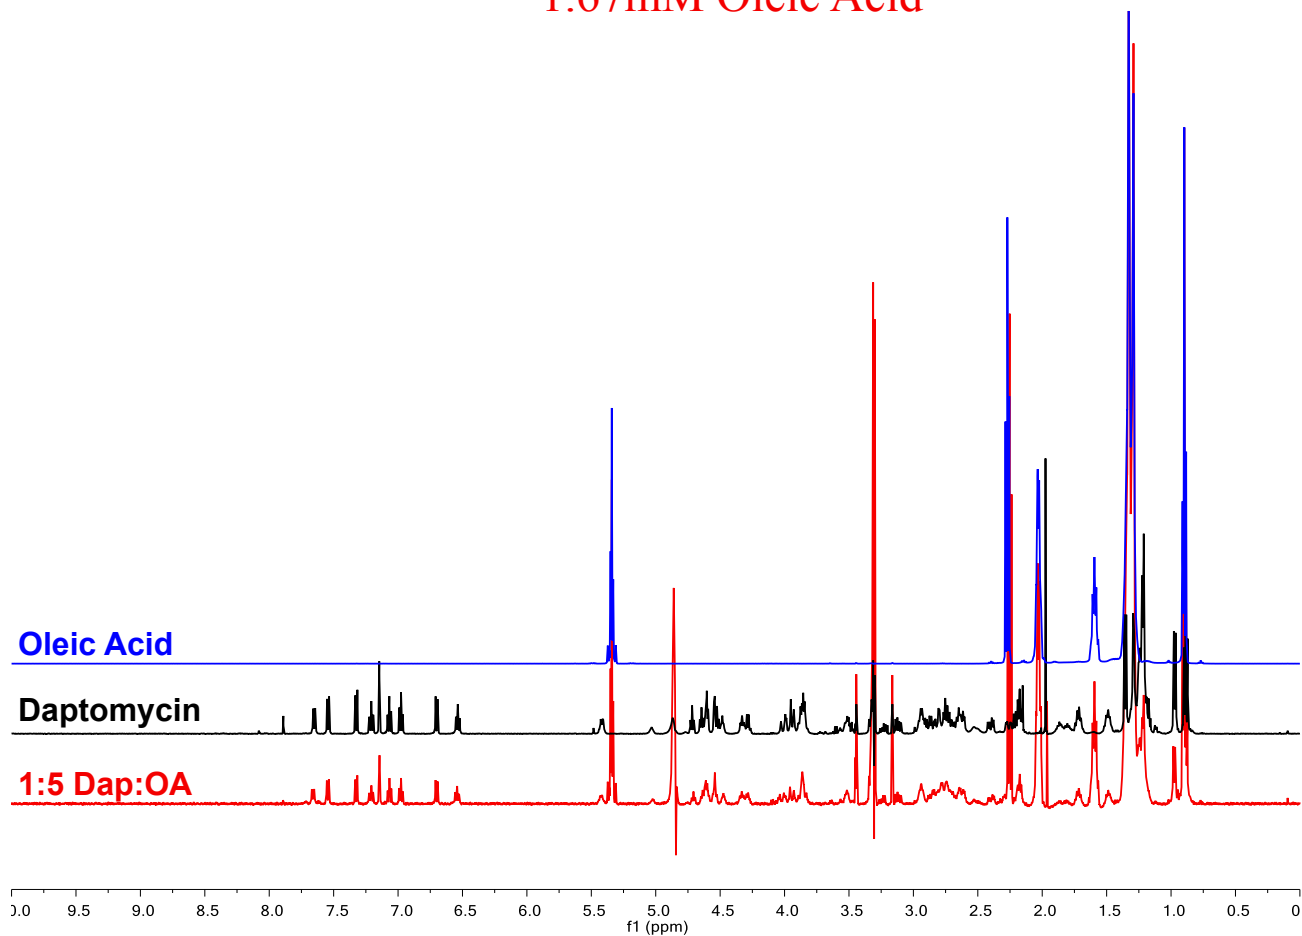

**Supplemental Fig S2.** Excess oleic acid reveals no observable interaction when mixed with daptomycin. The overlap of three individual <sup>1</sup>H NMR spectra, between 0.0 to 10.0 ppm, shows no spatial interaction with daptomycin in the presence of excess oleic acid. The top spectra (blue) represents a 1mM solution of oleic acid, the middle spectra (black) represents a 340 $\mu$ M solution of daptomycin, and the bottom spectra (red) represents a 1:5 mixture of daptomycin:oleic acid. All solutions were made using methanol-d<sub>4</sub>, and spectra were generated using a VNMRs 500 MHz instrument. Spectra were superimposed using MestReNova software.
